# Supplementary material for: Inhibiting NLRP3 Inflammasome Activation by CY-09 Helps to Restore Cerebral Glucose Metabolism in 3×Tg-AD Mice
Source: MDPI journal article supplement (doi:10.3390/antiox12030722), 2023-03-15
Supplement: s1 [file s1]

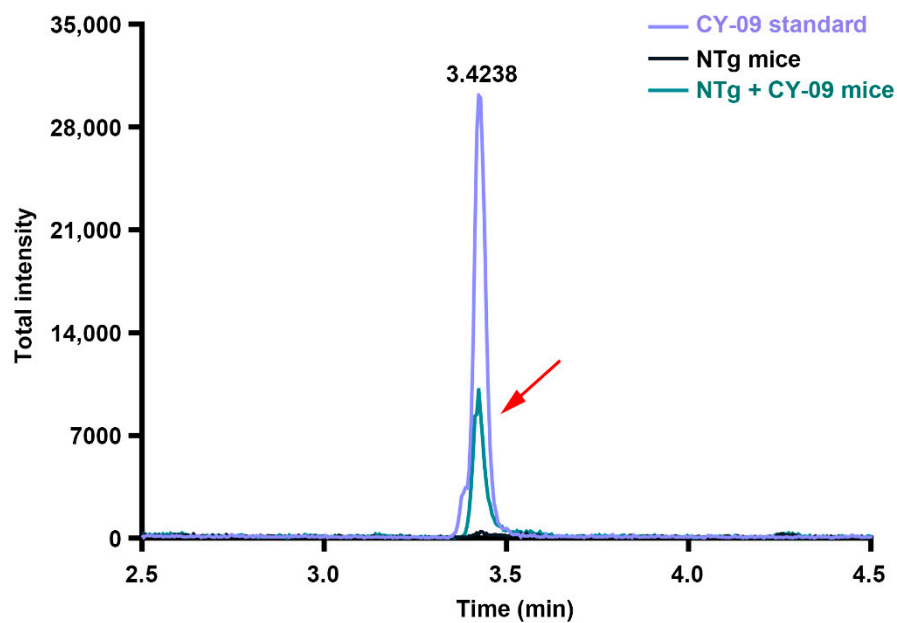

Figure S1. Content of CY-09 in NTg and NTg + CY-09 mice brains.

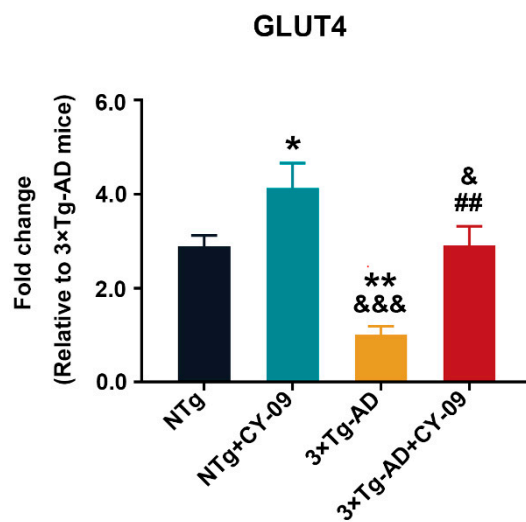

Figure S2. Fluorescence intensity of GLUT4 in NTg, NTg + CY-09, 3xTg-AD and 3xTg-AD + CY-09 mice (n=6, mean  $\pm$  SD, one-way ANOVA and Bonferroni post hoc test; \*  $p < 0.05$ , \*\*  $p < 0.01$  vs. NTg mice, &  $p < 0.05$ , &&&  $p < 0.001$  vs. NTg + CY-09 mice, ##  $p < 0.01$  vs. 3xTg-AD mice).

**a**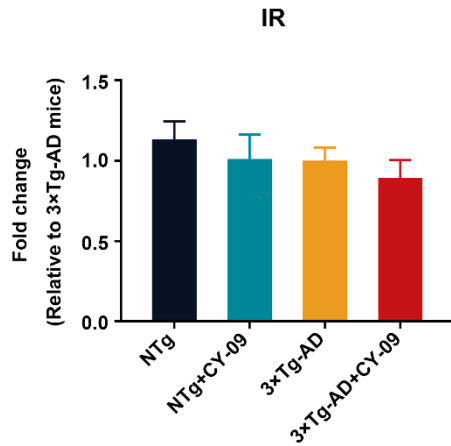**b**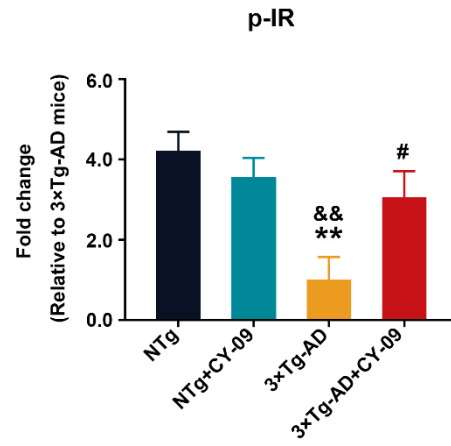

**Figure S3.** Fluorescence intensity of (a) IR and (b) p-IR in NTg, NTg + CY-09, 3xTg-AD and 3xTg-AD + CY-09 mice (n=6, mean  $\pm$  SD, one-way ANOVA and Bonferroni post hoc test; \*\*  $p < 0.01$  vs. NTg mice, &&  $p < 0.01$  vs. NTg + CY-09 mice, #  $p < 0.05$  vs. 3xTg-AD mice).

**a**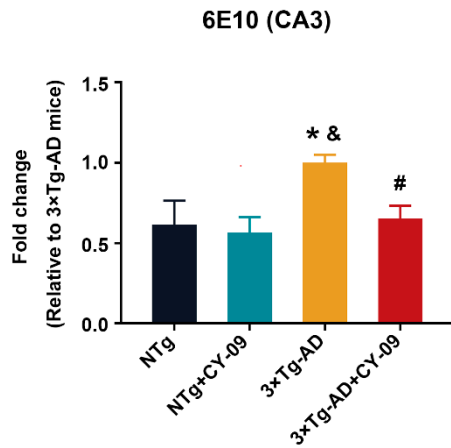**b**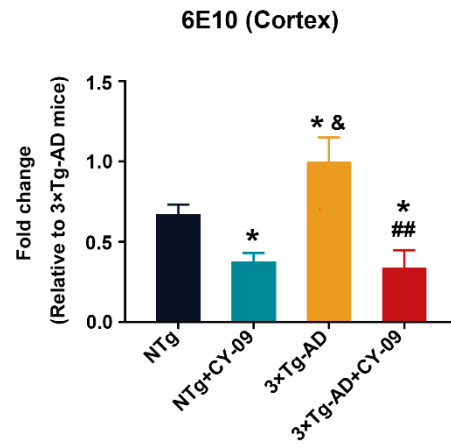

**Figure S4.** Fluorescence intensity of A $\beta$  (6E10) in (a) CA3 region and (b) cortex of NTg, NTg + CY-09, 3xTg-AD and 3xTg-AD + CY-09 mice (n=6, mean  $\pm$  SD, one-way ANOVA and Bonferroni post hoc test; \*  $p < 0.05$  vs. NTg mice, &  $p < 0.05$  vs. NTg + CY-09 mice, #  $p < 0.05$ , ##  $p < 0.01$  vs. 3xTg-AD mice).

**a**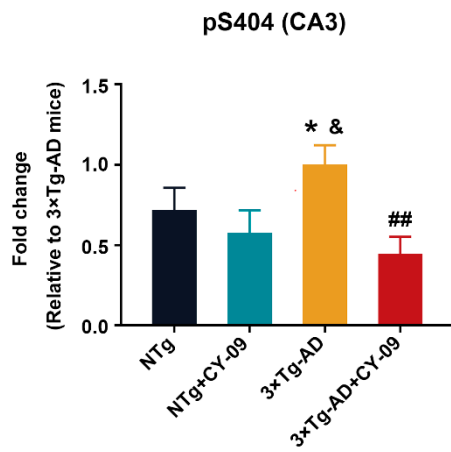**b**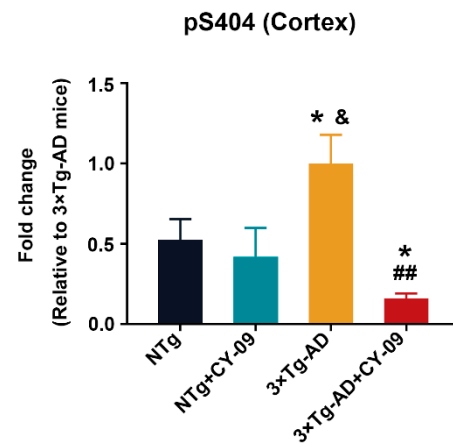

**Figure S5.** Fluorescence intensity of p-tau-S404 in (a) CA3 region and (b) cortex of NTg, NTg + CY-09, 3xTg-AD and 3xTg-AD + CY-09 mice (n=6, mean  $\pm$  SD, one-way ANOVA and Bonferroni post hoc test; \*  $p < 0.05$  vs. NTg mice, &  $p < 0.05$  vs. NTg + CY-09 mice, ##  $p < 0.01$  vs. 3xTg-AD mice).
